# Supplementary material
Source: HighWire-hosted journal article supplement (https://jitc.bmj.com/content/9/9/e002954)

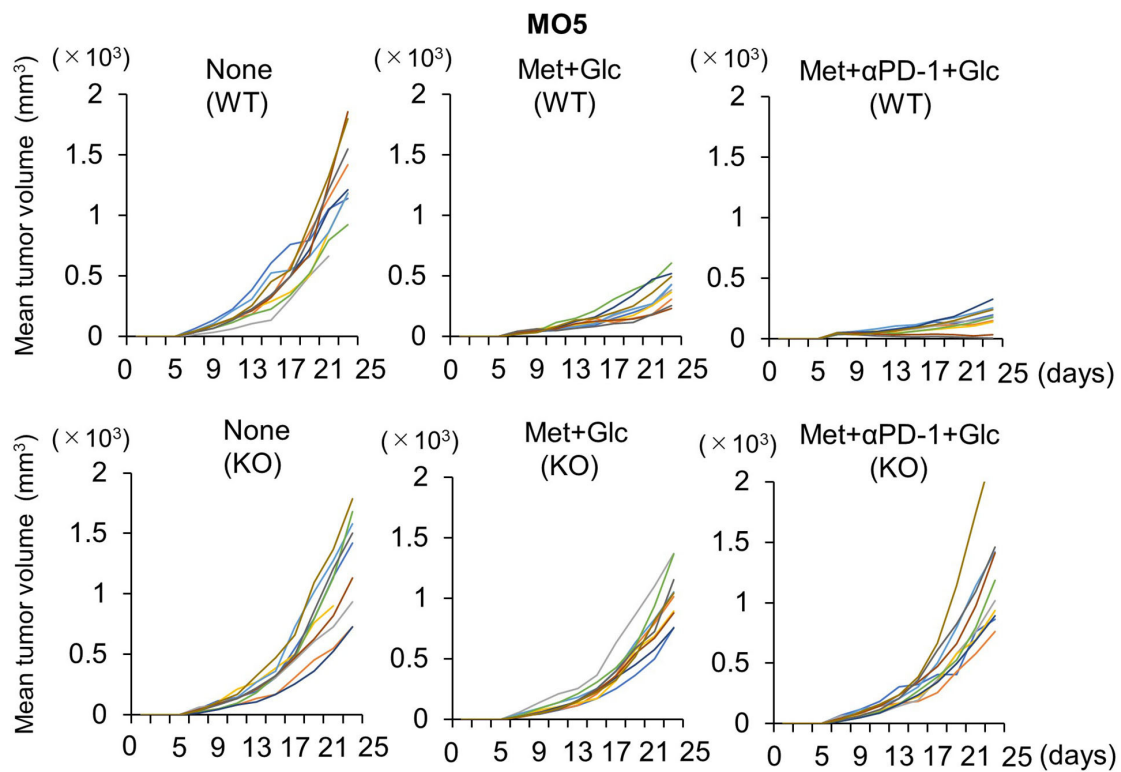

Supplement: inline-supplementary-material-10 [file inline-supplementary-material-10.pdf]

**A**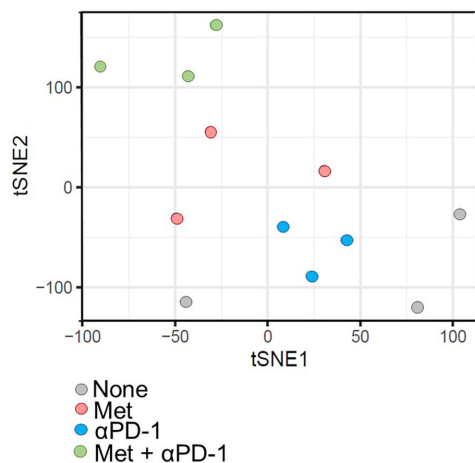**B. wPGSA**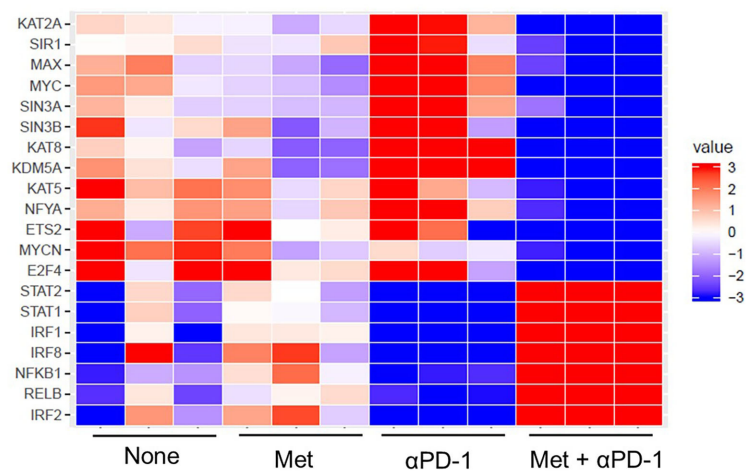**C. GAGE-KEGG**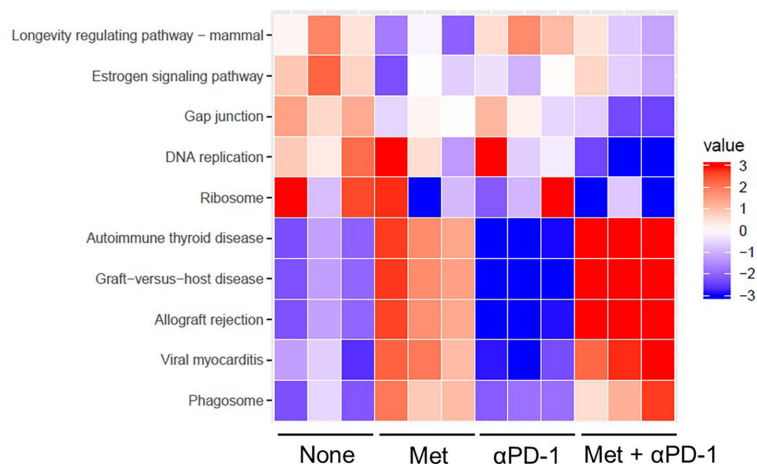**D. GAGE-GO**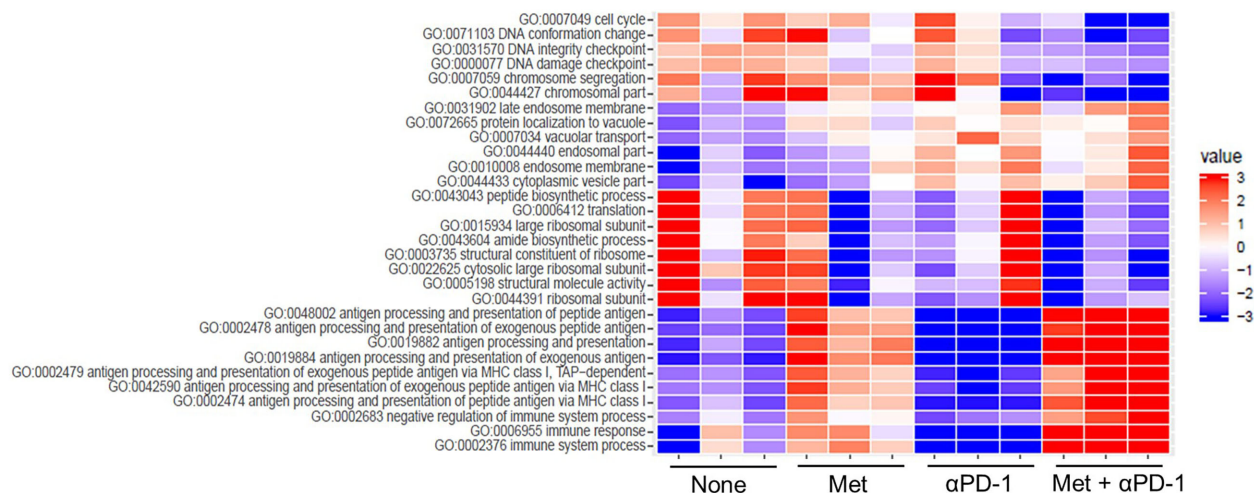

Supplement: inline-supplementary-material-12 [file inline-supplementary-material-12.pdf]

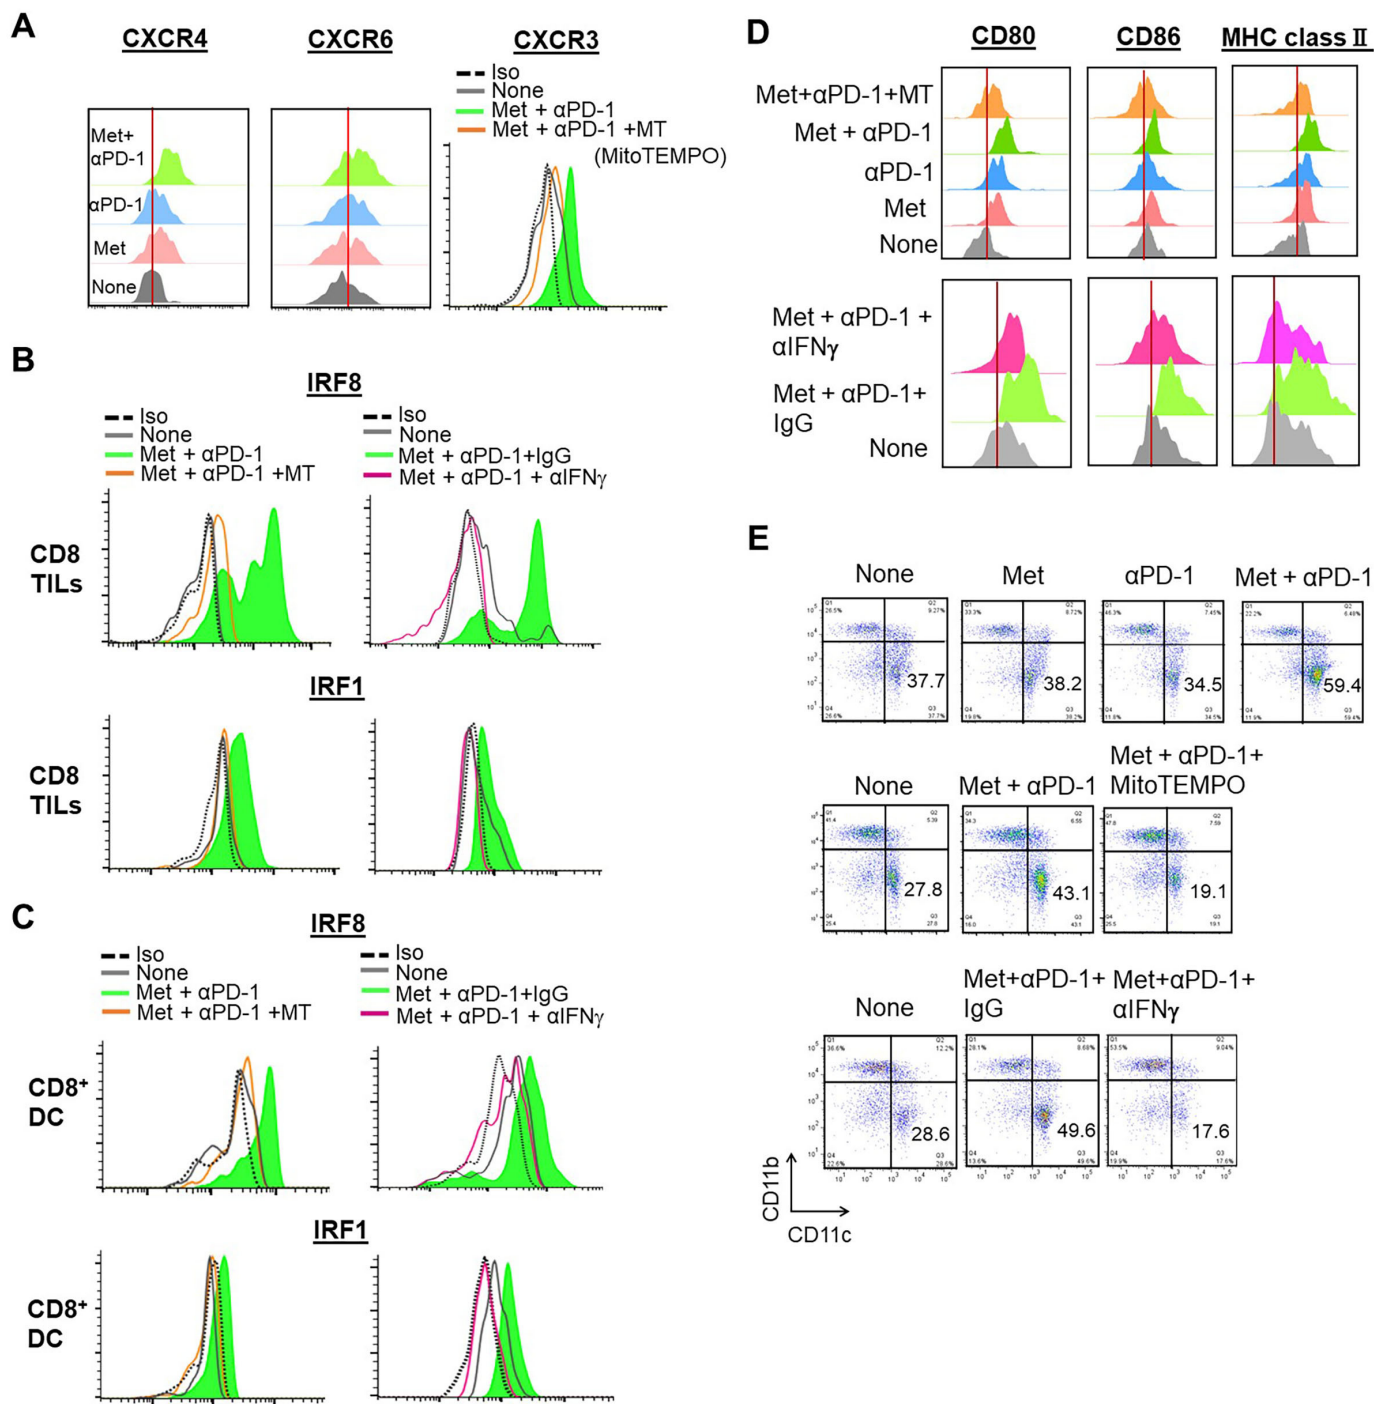

Supplement: inline-supplementary-material-13 [file inline-supplementary-material-13.pdf]

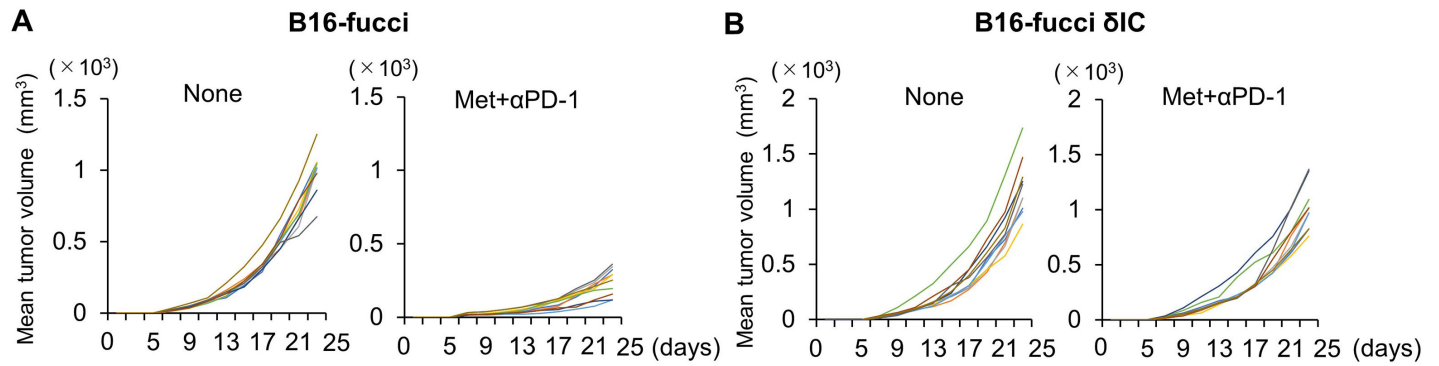

Supplement: inline-supplementary-material-14 [file inline-supplementary-material-14.pdf]

## Oxidative phosphorylation

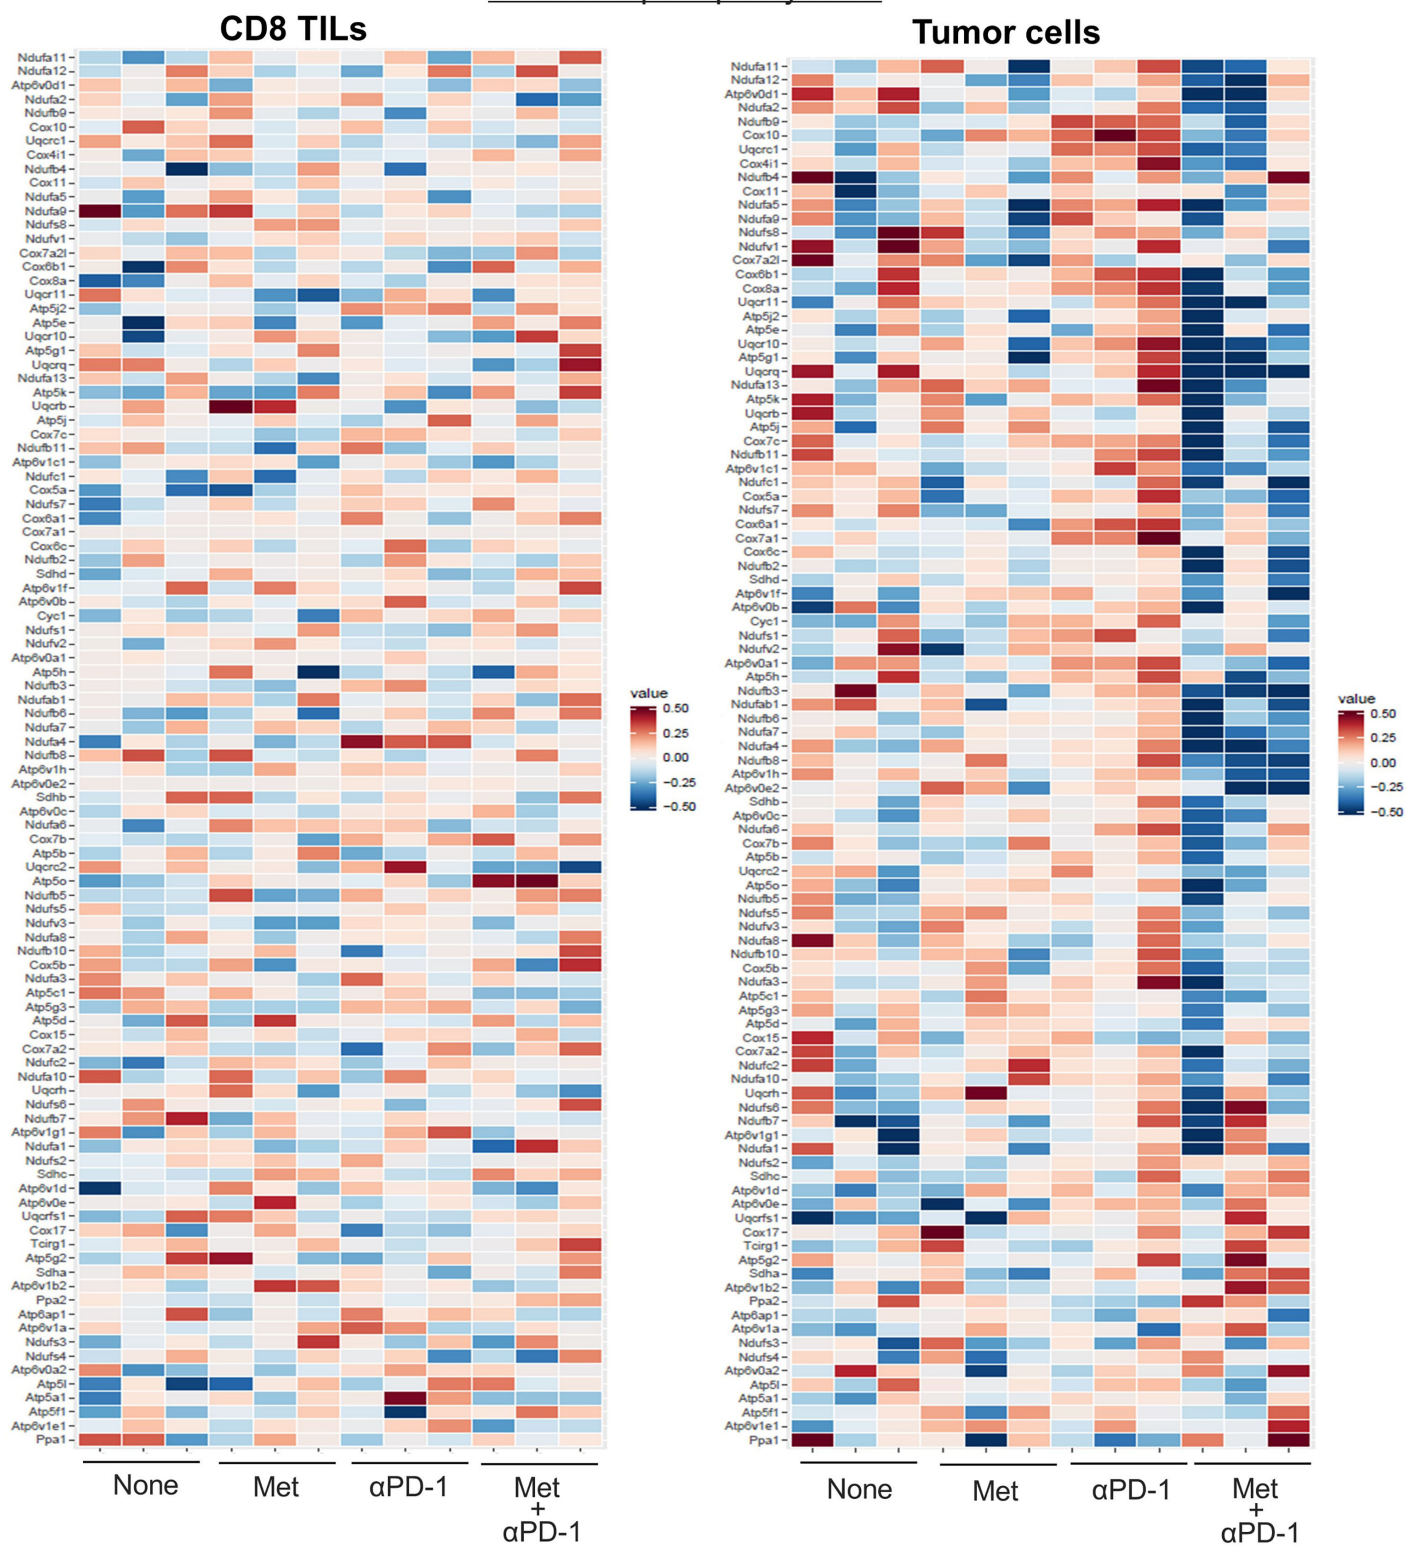

Supplement: inline-supplementary-material-15 [file inline-supplementary-material-15.pdf]

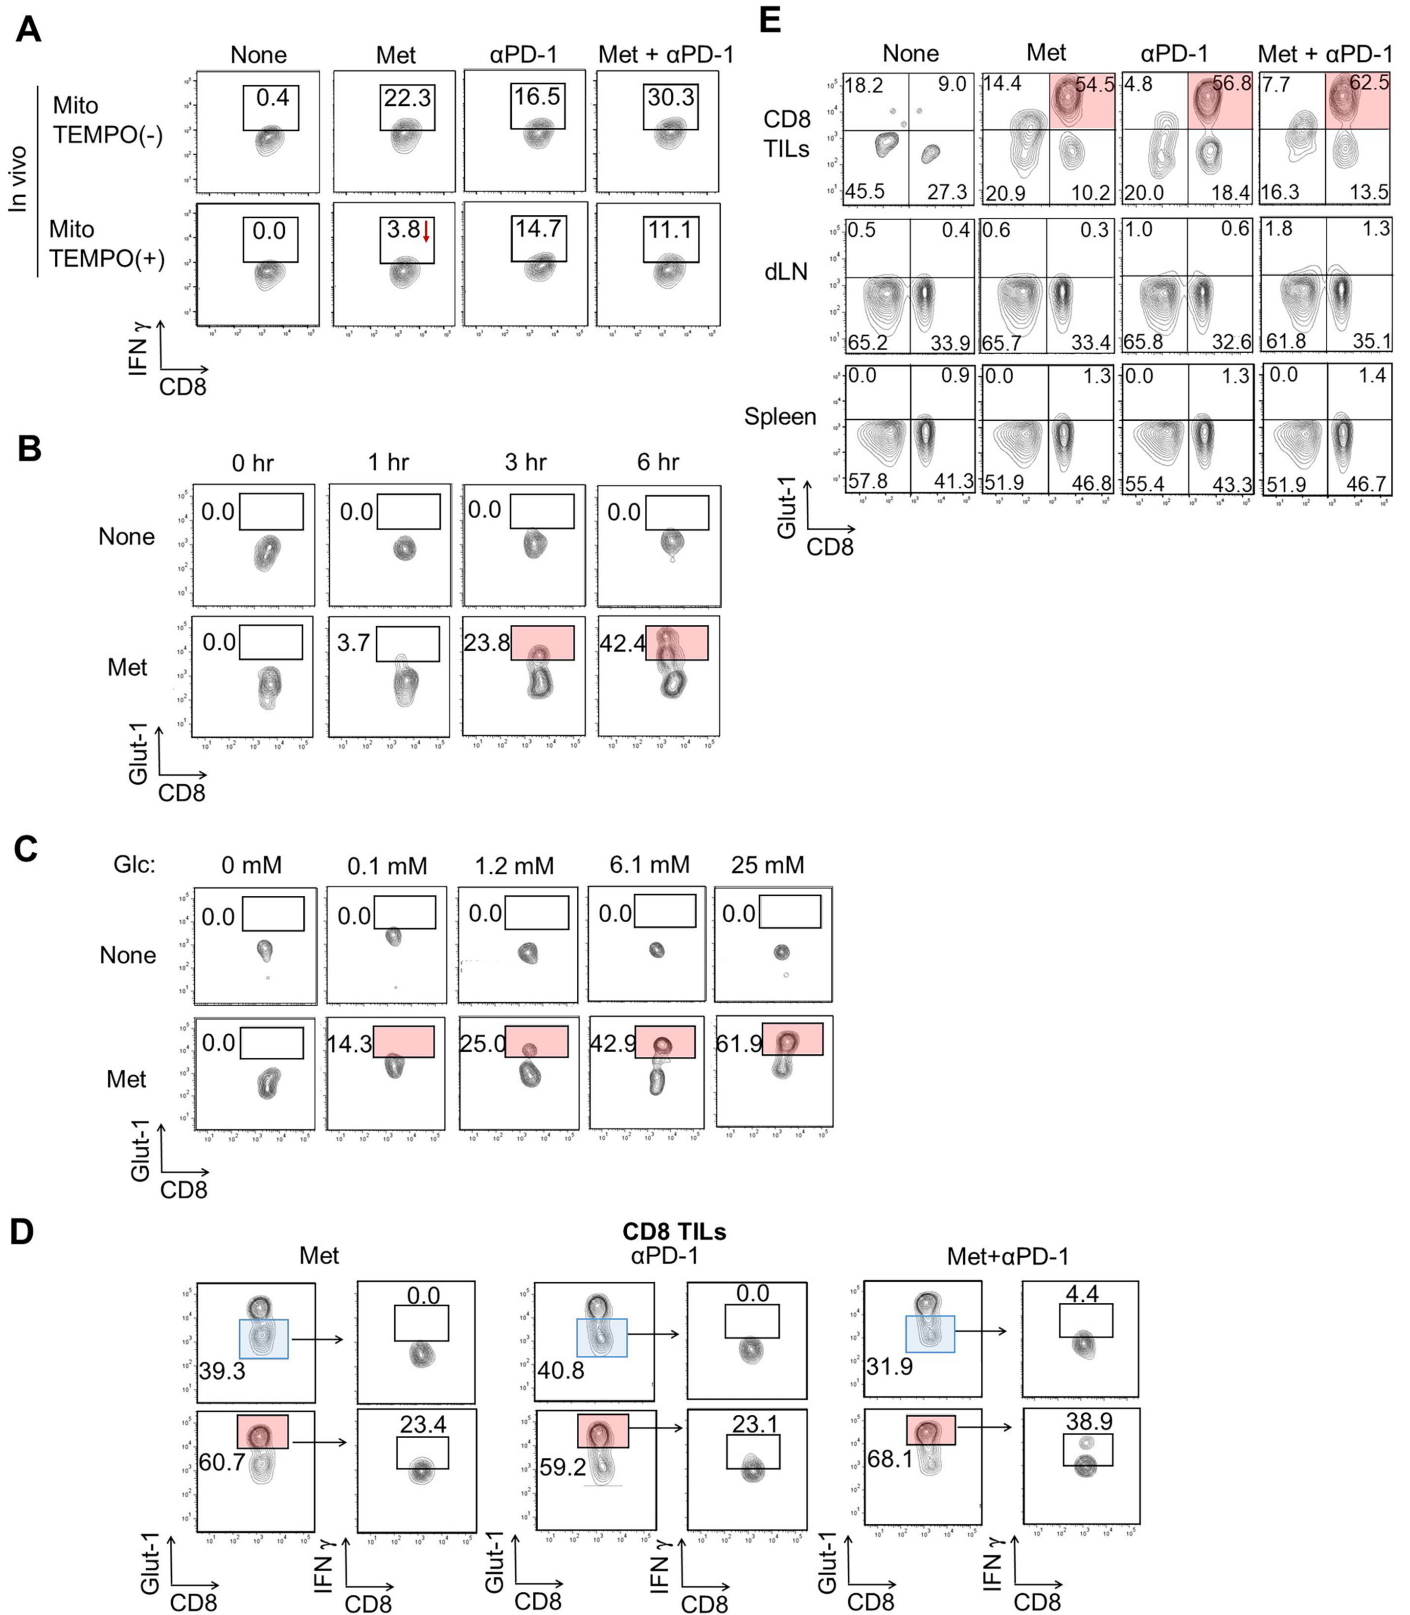

Supplement: inline-supplementary-material-3 [file inline-supplementary-material-3.pdf]

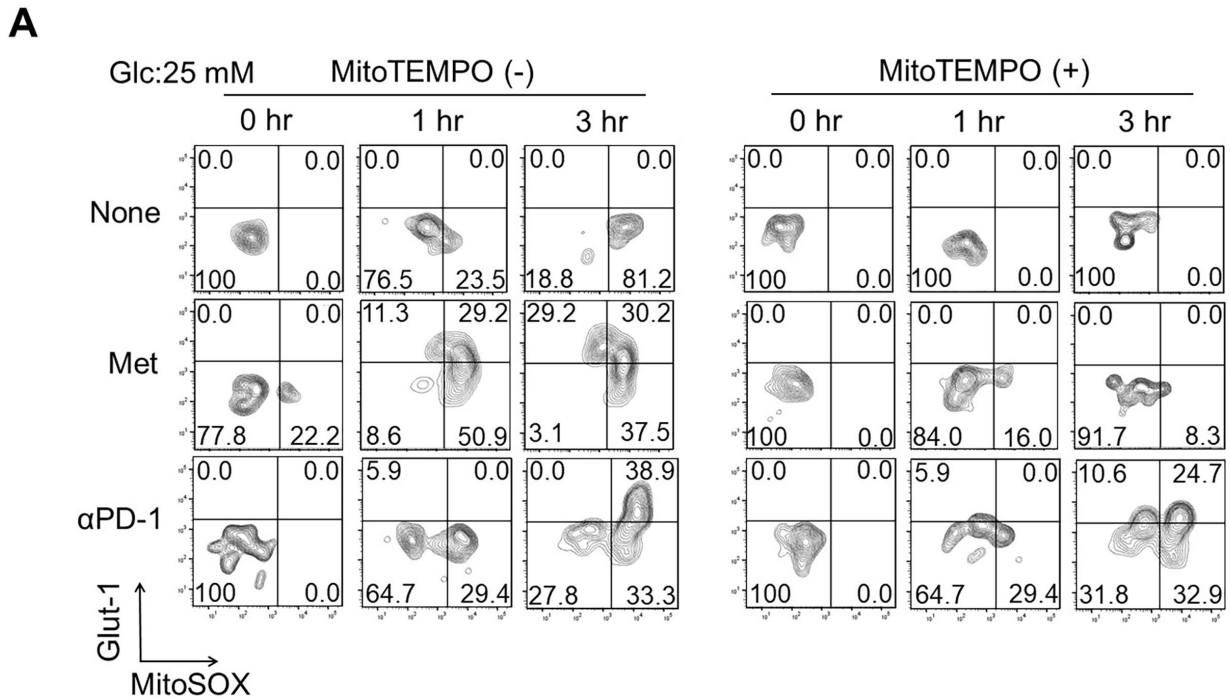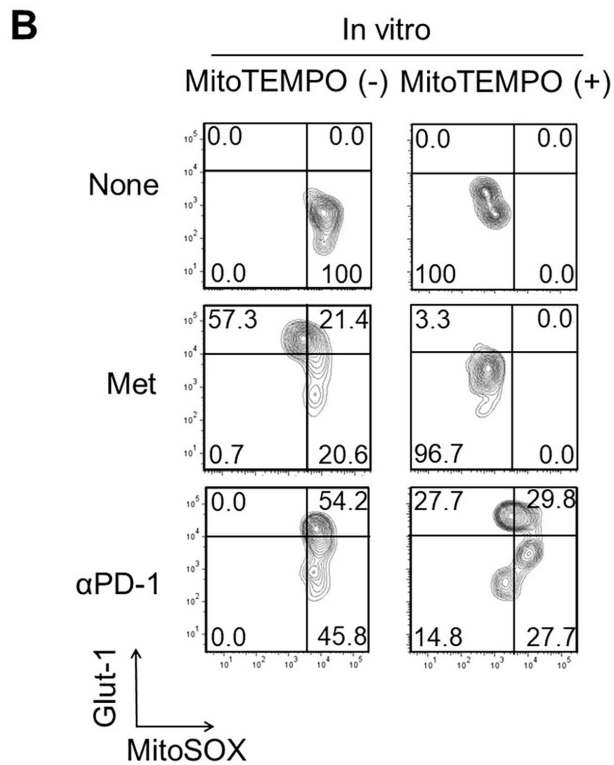

Supplement: inline-supplementary-material-4 [file inline-supplementary-material-4.pdf]

**A MethA**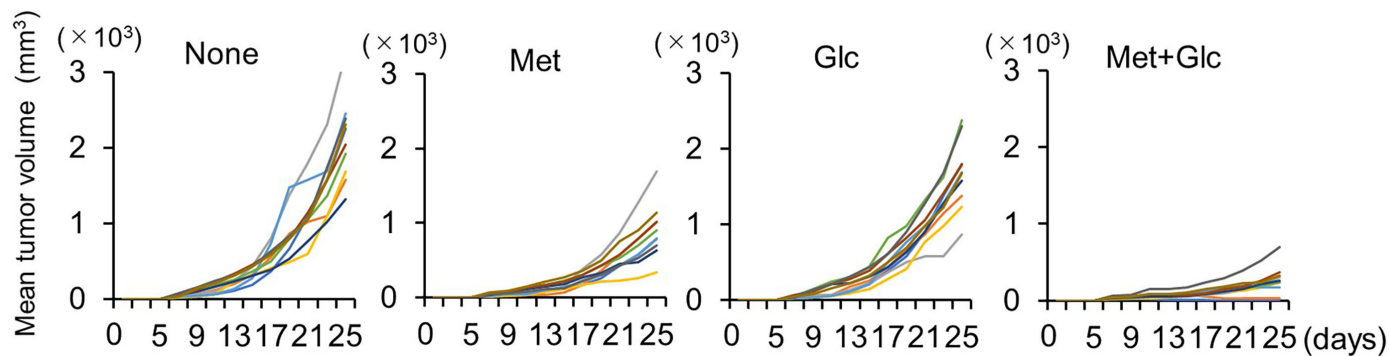**B**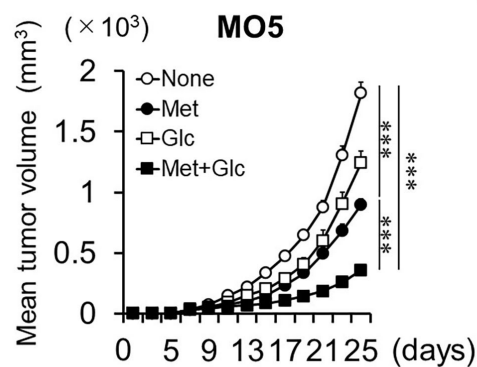**C**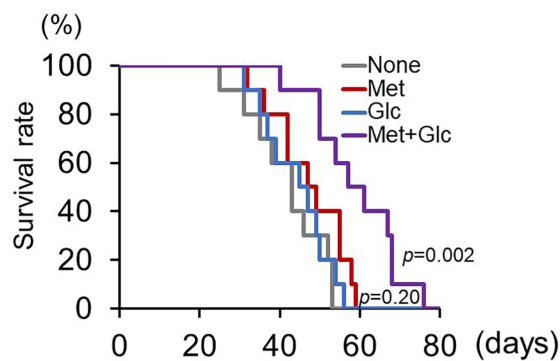**D MO5**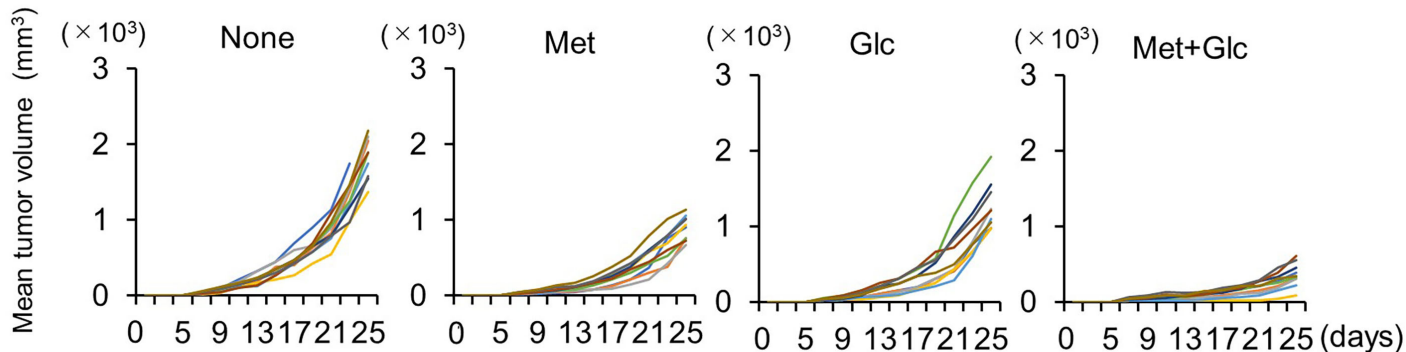

Supplement: inline-supplementary-material-5 [file inline-supplementary-material-5.pdf]

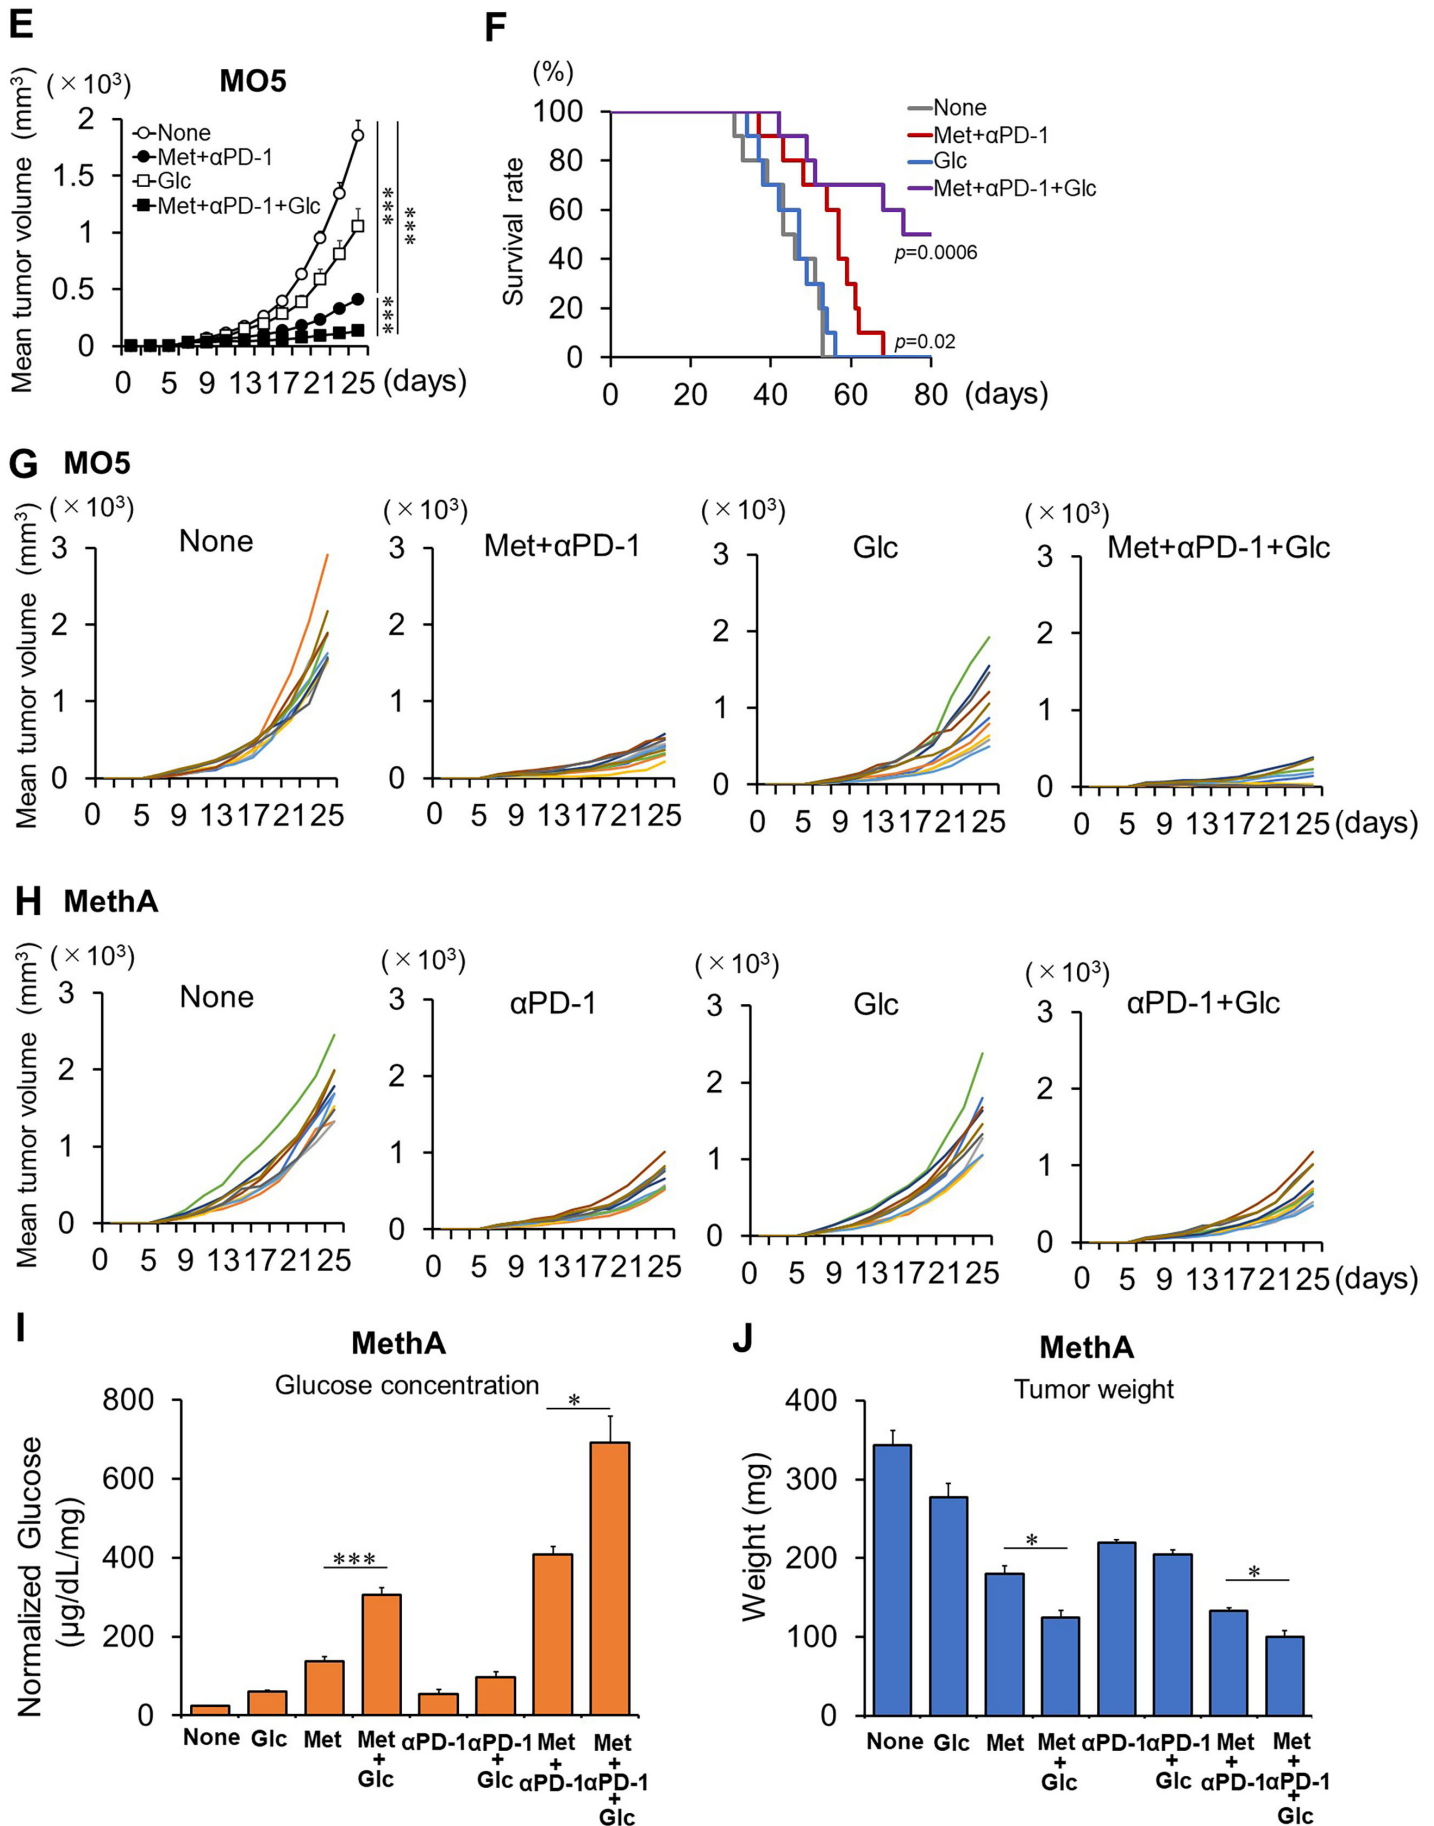

Supplement: inline-supplementary-material-6 [file inline-supplementary-material-6.pdf]

## A Targeting Vector for conditional KO (Nfe2l2) mouse

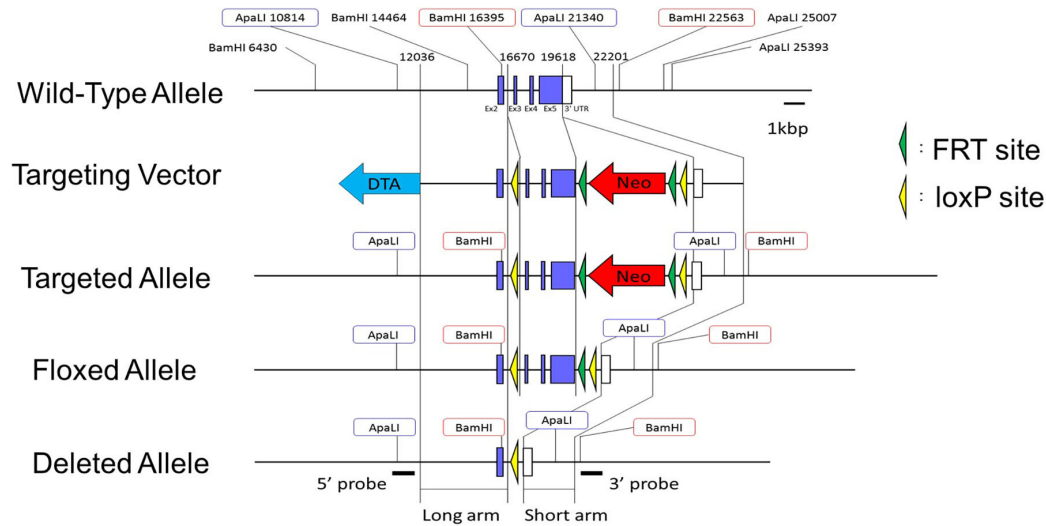

## B

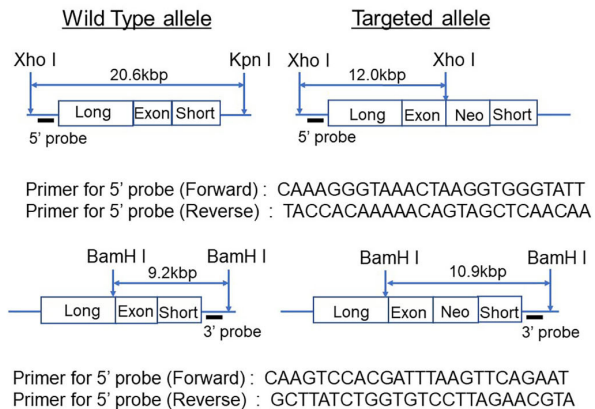

## C

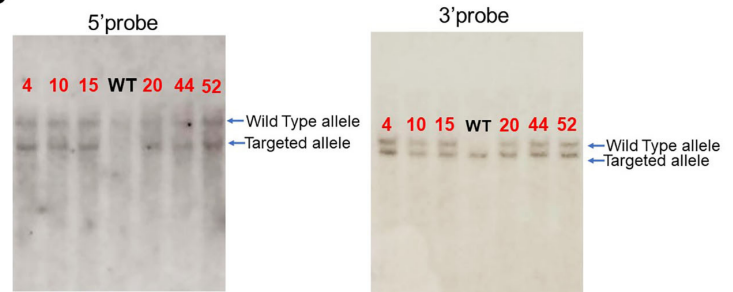

## D

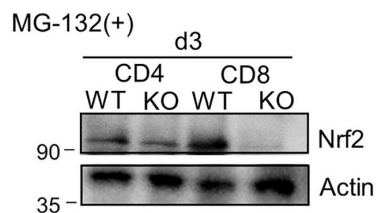

Supplement: inline-supplementary-material-7 [file inline-supplementary-material-7.pdf]

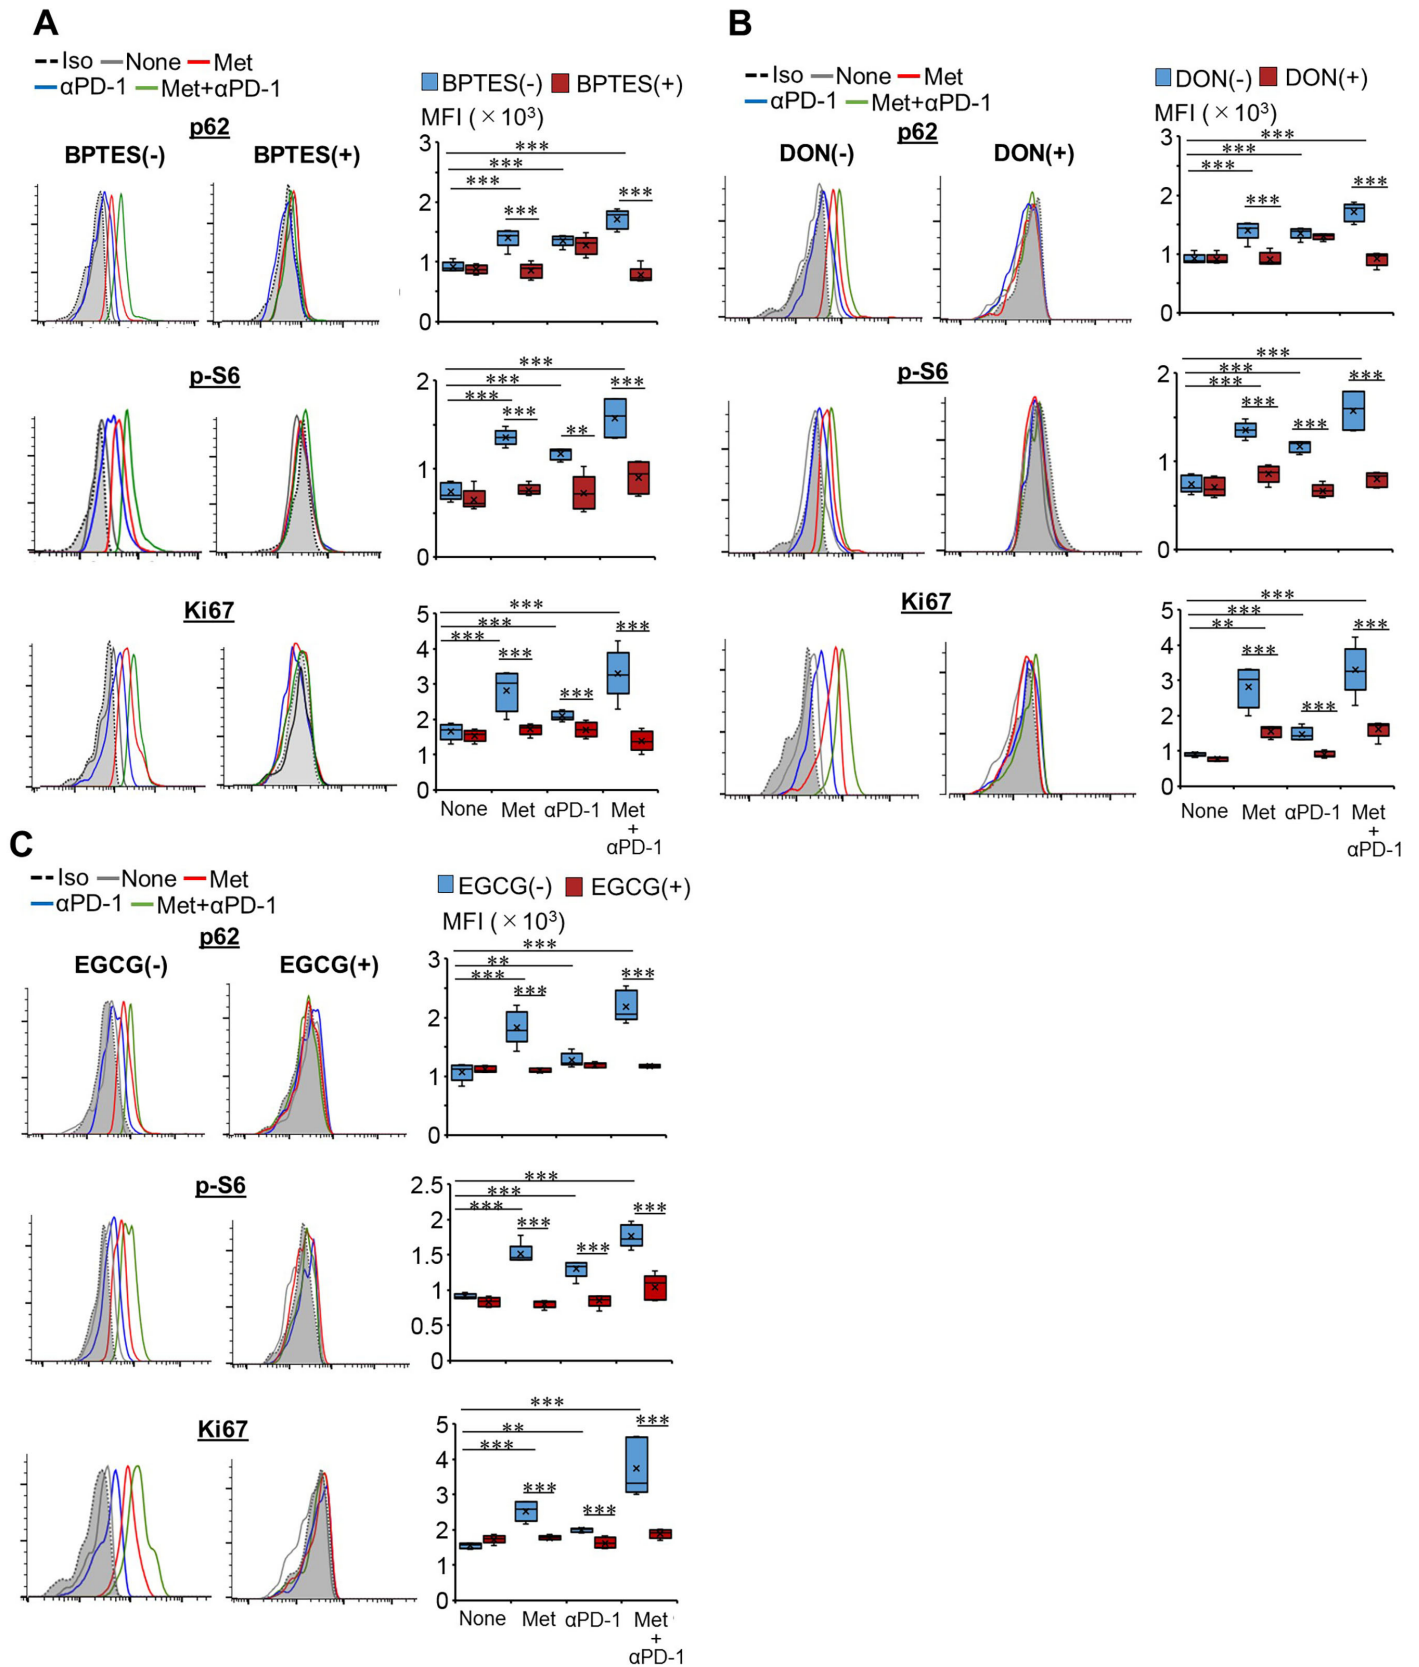

Supplement: inline-supplementary-material-9 [file inline-supplementary-material-9.pdf]
